# Supplementary material
Source: ML conference proceedings conference paper supplement (https://openreview.net/forum?id=KemSBwOYJC)

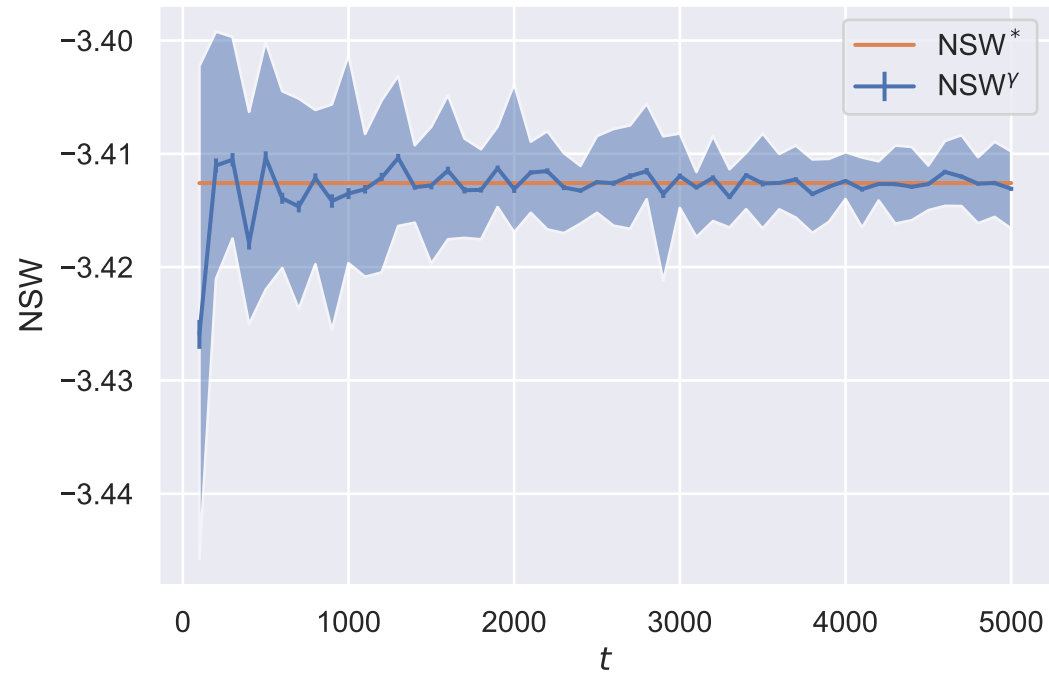

Supplement: supplementary_material [file attachment]

Sample Quantiles

0.2  
0.1  
0.0  
-0.1  
-0.2  
-0.3

-0.03 -0.02 -0.01 0.00 0.01 0.02 0.03

Theoretical Quantiles

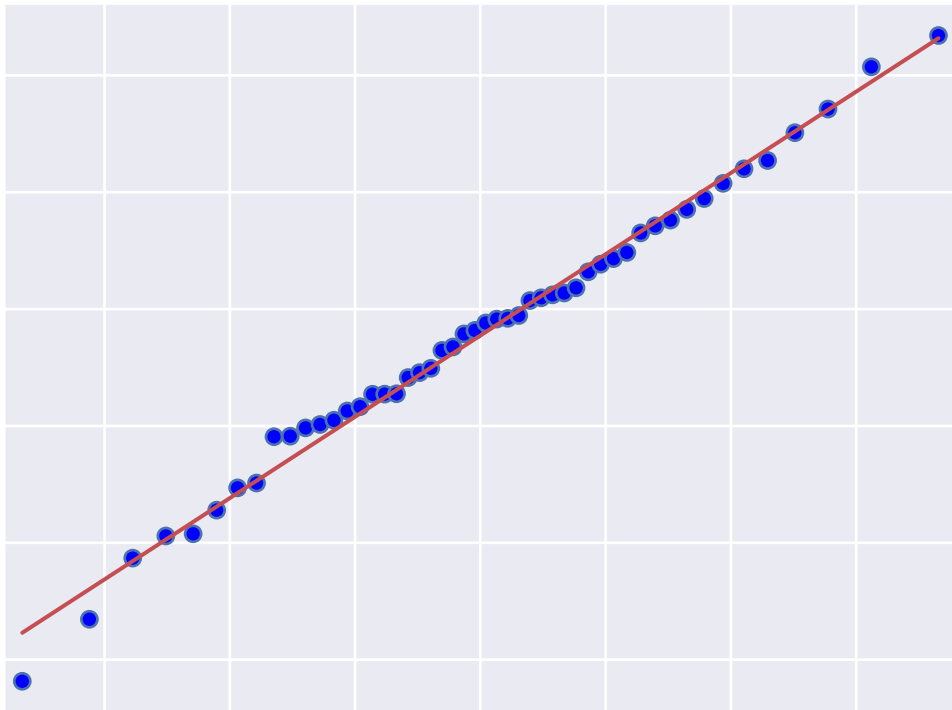

Supplement: supplementary_material [file attachment]

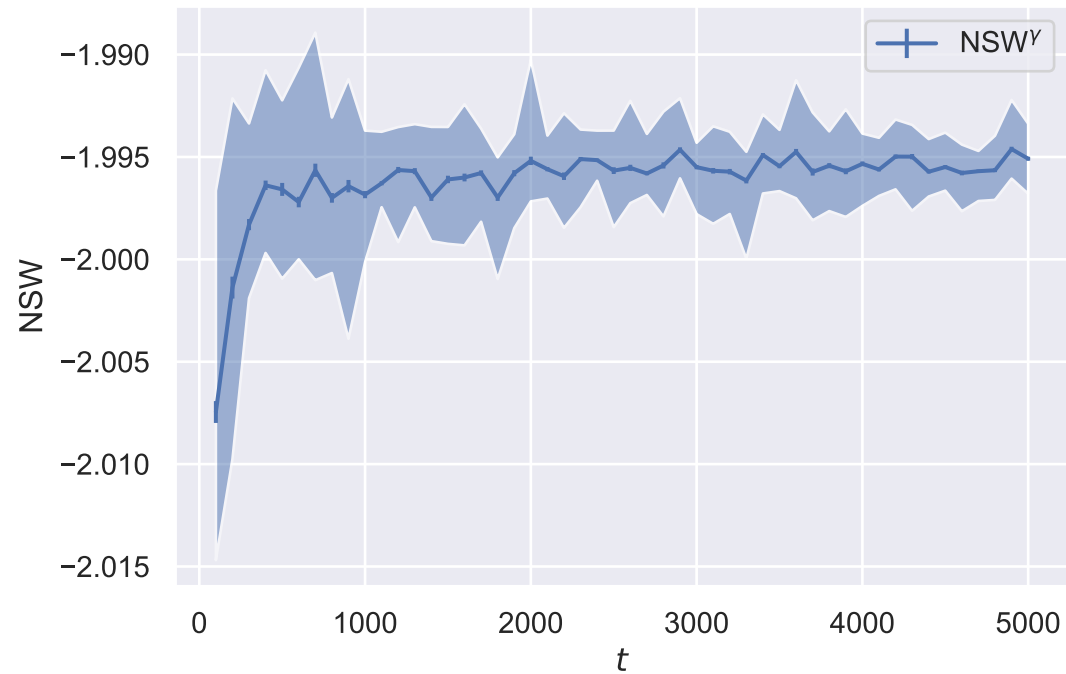

Supplement: supplementary_material [file attachment]

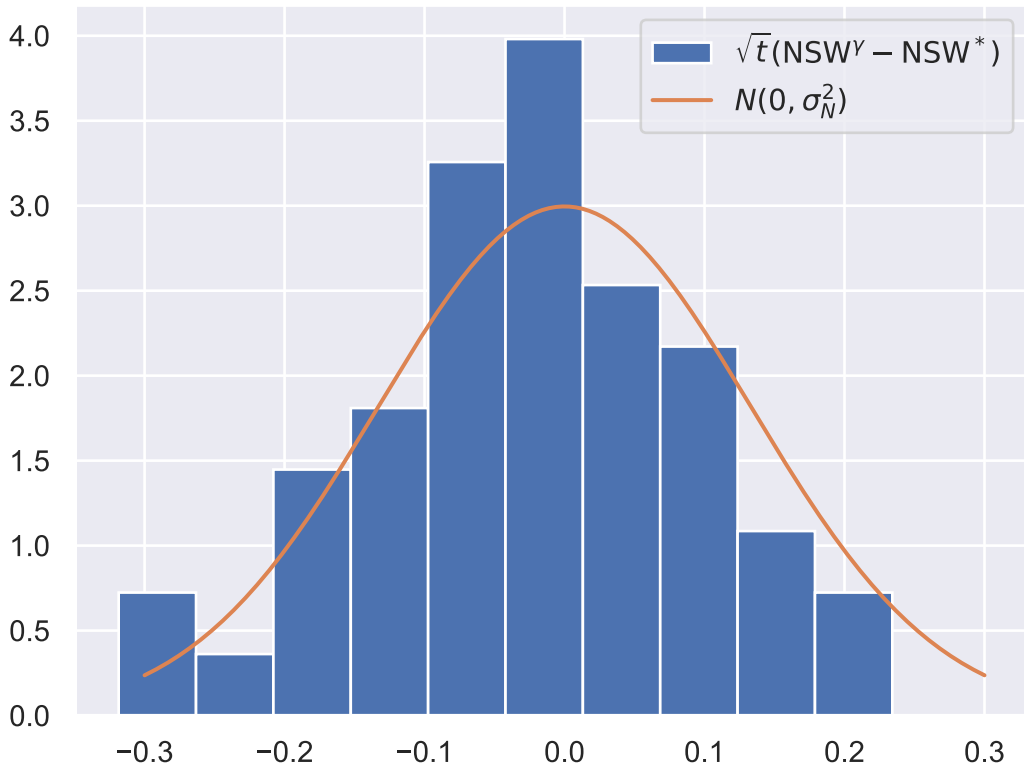

Supplement: supplementary_material [file attachment]
